# Supplementary material
Source: Springer Nature journal article supplement (https://www.springermedizin.de/resource/supplementary/12913_2011_2498_MOESM1_ESM.pdf/9532098)

**Figure S1.** Difference between usual care group and intervention group scores on 24 'mother' risk indicators of quality of care,

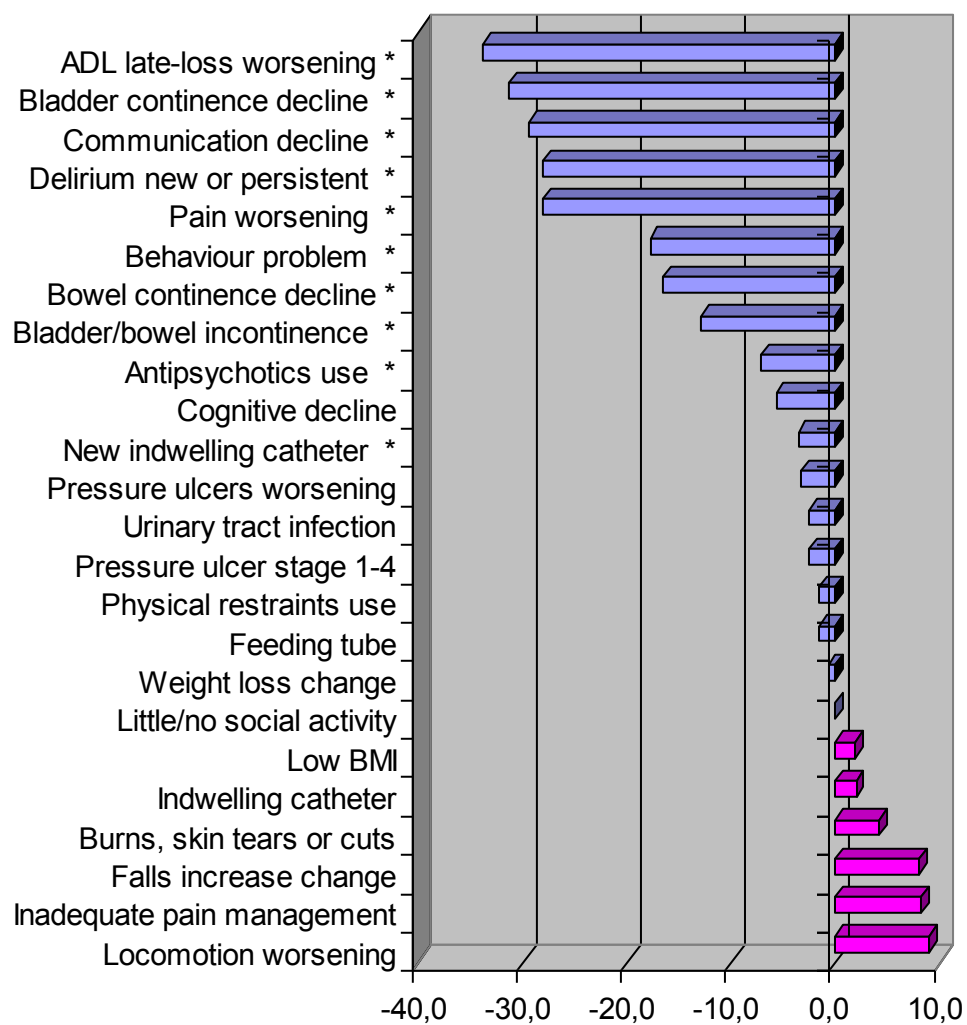

Supplement: MOESM1 [file 9532098]
